# Supplementary material
Source: PubMed Central journal article supplement (PMC4799499)
Supplement: supp_fj.15-282426_Supplemental_Figures2.pdf [file supp_fj.15-282426_Supplemental_Figures2.pdf]

**Figure S3.**

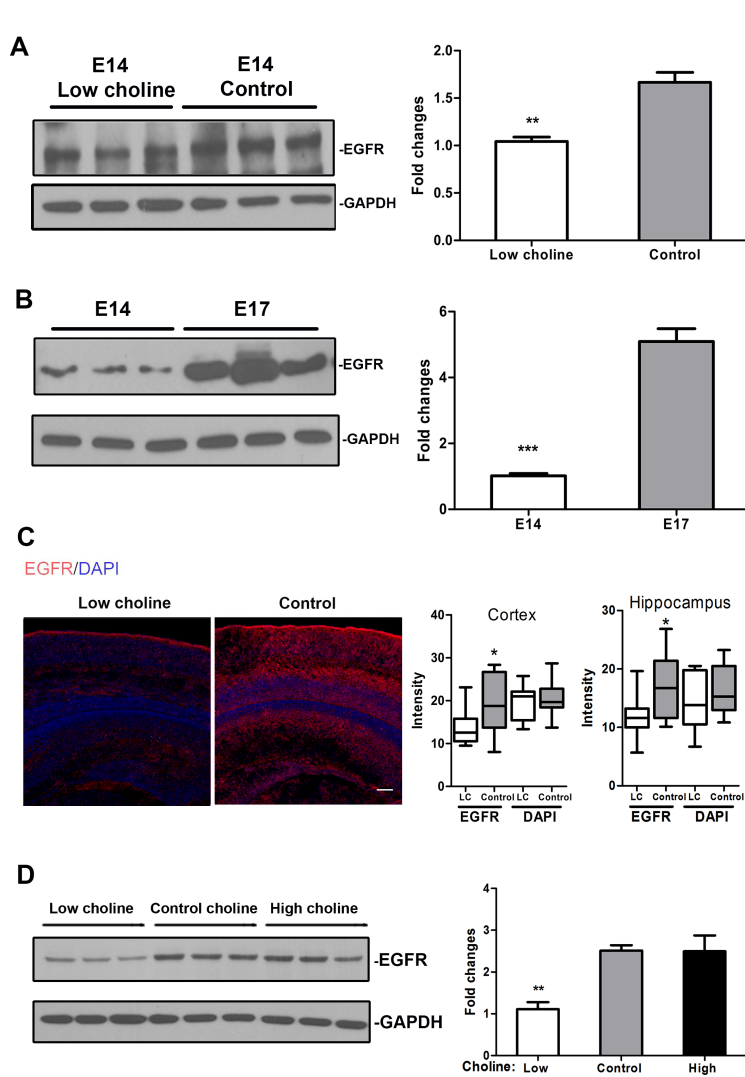

**Figure S3. Changes in EGFR protein levels in LC brains.** (A, B) CFP+ cells were sorted from the cerebral hemispheres of E14 LC and CT brains (A), and E14 and E17 CT brains (B). Cell lysates were analyzed by western blot for EGFR and GAPDH. The bar graphs are the densitometric measurements of western blots done with cell extracts from three different embryos born from different litters. (C) Coronal sections were stained with anti-EGFR (red) and counterstained with DAPI (blue). Fluorescence intensity was measured as described in Methods. Scale bar represents 50  $\mu$ m. (D) E14 neurospheres were cultured in LC (5  $\mu$ M), CT (70  $\mu$ M) or high choline (315  $\mu$ M) conditions for 48 hours. A representative blot for EGFR from three independent experiments is shown. The bar graph is a summary of densitometric measurements. Data are presented as mean  $\pm$  SEM; \* $p$  < 0.05, \*\* $p$  < 0.01, \*\*\* $p$  < 0.001 by Student's t test. At least three samples were analyzed for each group.

**Figure S4.**

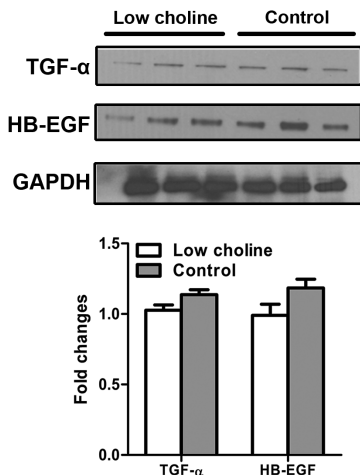

**Figure S5. Protein expression of EGF ligands in the E17 brains.**

Western blot of whole brain lysates from LC and CT E17 brains probed for EGF ligand TGF- $\alpha$  and HB-EGF. The bar graph is a summary of densitometric measurements of western blots done with three different embryos lysates. Data are presented as mean  $\pm$  SEM. No significant difference was found by Student's t test.
