# Supplementary material
Source: PubMed Central journal article supplement (PMC4799499)
Supplement: supp_fj.15-282426_Supplemental_Table1.pdf [file supp_fj.15-282426_Supplemental_Table1.pdf]

## SUPPLEMENTAL DATA

**Table S1. List of antibodies and dyes.**

| Primary antibodies                 |                   |                        |                              |          |
|------------------------------------|-------------------|------------------------|------------------------------|----------|
| Immunofluorescence                 | Antigen           | Host                   | Manufacturer                 | Dilution |
|                                    | Cleaved caspase-3 | Rabbit                 | Cell Signaling               | 1:80     |
|                                    | Cux1              | Rabbit                 | Santa Cruz                   | 1:200    |
|                                    | EGFP              | Chicken                | Aves                         | 1:1000   |
|                                    | EGFR              | Rabbit                 | Abcam                        | 1:1000   |
|                                    | Ki67              | Rabbit                 | Abcam                        | 1:500    |
|                                    | Pax6              | Mouse                  | Developmental Hybridoma Bank | 1:50     |
|                                    | PH3               | Rabbit                 | Millipore                    | 1:1000   |
|                                    | Satb2             | Mouse                  | Abcam                        | 1:200    |
|                                    | Tbr1              | Rabbit                 | Abcam                        | 1:200    |
|                                    | Tbr2              | Rabbit                 | Abcam                        | 1:500    |
|                                    | Tuj1              | Mouse                  | Covance                      | 1:2000   |
|                                    | GFAP              | Rabbit                 | Dako                         | 1:2000   |
|                                    | GFP               | Chicken                | Aves                         | 1:1000   |
|                                    | Nestin            | Mouse                  | Millipore                    | 1:1000   |
| Western Blot                       | REST              | Rabbit                 | Millipore                    | 1:1000   |
|                                    | EGFR              | Rabbit                 | Cell Signaling               | 1:1000   |
|                                    | p-EGFR            | Rabbit                 | Cell Signaling               | 1:1000   |
|                                    | Erk1/2            | Rabbit                 | Cell Signaling               | 1:1000   |
|                                    | p-Erk1/2          | Rabbit                 | Cell Signaling               | 1:1000   |
|                                    | Akt               | Rabbit                 | Cell Signaling               | 1:1000   |
|                                    | p-Akt             | Rabbit                 | Cell Signaling               | 1:1000   |
|                                    | FGFR3             | Rabbit                 | Santa Cruz                   | 1:100    |
|                                    | IGFR              | Rabbit                 | Cell Signaling               | 1:2000   |
|                                    | Patched           | Rabbit                 | Santa Cruz                   | 1:200    |
|                                    | TGF- $\alpha$     | Mouse                  | Santa Cruz                   | 1:100    |
|                                    | HB-EGF            | Rabbit                 | Santa Cruz                   | 1:100    |
|                                    | GAPDH             | Rabbit                 | Cell Signaling               | 1:5000   |
| Secondary antibodies               |                   |                        |                              |          |
| Antibody                           | Host              | Manufacturer           | Dilution                     |          |
| Anti-rabbit CY3                    | Goat              | Jackson Immunoresearch | 1:250                        |          |
| Anti-mouse Alexa Fluor 647         | Goat              | Jackson Immunoresearch | 1:2000                       |          |
| Anti-mouse Alexa Fluor 488         | Goat              | Jackson Immunoresearch | 1:2000                       |          |
| Anti-chicken Alexa Fluor 647       | Goat              | Jackson Immunoresearch | 1:500                        |          |
| Horseradish peroxidase anti-rabbit | Goat              | Jackson Immunoresearch | 1:50000                      |          |
| Horseradish peroxidase anti-mouse  | Goat              | Jackson Immunoresearch | 1:50000                      |          |
| Fluorescent dyes                   |                   |                        |                              |          |
| Dye                                | Manufacturer      |                        |                              | Dilution |
| DAPI                               | Sigma             |                        |                              | 1:2000   |
